# Supplementary material for: Measurement properties of self-report questionnaires on health-related quality of life and functional health status in dysphonia: a systematic review using the COSMIN taxonomy
Source: Springer Nature journal article supplement (doi:10.1007/s11136-018-2001-6), 2018-10-06
Supplement: MOESM1 [file 16179616]

**JOURNAL QUALITY OF LIFE RESEARCH**

**Measurement properties of self-report questionnaires on health-related quality of life and functional health status in dysphonia: a systematic review using the COSMIN taxonomy**

Supplementary Table 1. *Search strategies per literature database to retrieve questionnaires on FHS and/or HR-QoL.*

|  | **Databases and Search terms** | **Limits** | **Number of records** |
| --- | --- | --- | --- |
| **Subject Headings** | **Embase:** (questionnaire/ OR “severity of illness index”/ OR health status/ OR health survey/) AND (dysphonia/ OR voice disorder/ OR aphonia/ OR singing/) | N/A | 846 |
| **PubMed:** ("Surveys and Questionnaires"[Mesh] OR "Severity of illness index"[mesh] OR "health Status"[Mesh]) AND (“Dysphonia” [Mesh] OR “Voice Disorders” [Mesh] OR “Hoarseness” [Mesh] OR “Aphonia” [Mesh] OR “Singing” [Mesh]) | N/A | 1,284 |
| **Free Text** | **Embase:** (questionnaire* OR survey*) AND (dysphon* OR hoarseness OR roughness OR voice OR aphon* OR sing* or sang) | Time limit:  2016 to Current | 331 |
| **PubMed:** *As per Embase Free Text* | Time limit:  01/01/2016 to 22/11/2016 | 281 |

Supplementary Table 2. *Database search strategies to retrieve publications on the psychometric properties of the retrieved questionnaires.*

|  | **Databases and Search terms** | **Limits** | **Number of records** |
| --- | --- | --- | --- |
| **Subject Headings** | **Embase**: ((Evaluation of the Ability to Sing Easily) OR EASE OR (Glottal Function Index) OR (GFI) OR (Singing Voice Handicap Index) OR SVHI OR (Singing Voice Handicap Index-10) OR SVHI-10 OR (Transgender Self-Evaluation Questionnaire) OR TSEQ OR (Transsexual Voice Questionnaire - Male to Female) OR TVQ-MtF OR (Voice Index) OR (Vocal Fatigue Index) OR VFI OR (Vocal Performance Questionnaire) OR VPQ OR (Voice Capabilities Questionnaire) OR VCQ OR (Voice Disability Coping Questionnaire) OR VDCQ OR (Voice Handicap Index) OR VHI OR (Voice Handicap Index-10) OR VHI-10 OR (Voice Outcome Survey) OR (Voice Rating Scale) OR VRS OR (Voice-Related Quality of Life) OR V-RQOL OR (Voice Symptom Scale) OR VoiSS) AND (psychometry/ OR validity/ OR reliability/ OR measurement error/ OR measurement precision/ OR measurement repeatability/ OR error/ OR statistical bias/ OR test retest reliability/ OR intrarater reliability/ OR interrater reliability/ OR accuracy/ OR criterion validity/ OR internal validity/ OR face validity/ OR external validity/ OR discriminant validity/ OR concurrent validity/ OR qualitative validity/ OR construct validity/ OR content validity/) | NA | 339 |
| **PubMed**: ((Evaluation of the Ability to Sing Easily) OR EASE OR (Glottal Function Index) OR (GFI) OR (Singing Voice Handicap Index) OR SVHI OR (Singing Voice Handicap Index-10) OR SVHI-10 OR (Transgender Self-Evaluation Questionnaire) OR TSEQ OR (Transsexual Voice Questionnaire - Male to Female) OR TVQ-MtF OR (Voice Index) OR (Vocal Fatigue Index) OR VFI OR (Vocal Performance Questionnaire) OR VPQ OR (Voice Capabilities Questionnaire) OR VCQ OR (Voice Disability Coping Questionnaire) OR VDCQ OR (Voice Handicap Index) OR VHI OR (Voice Handicap Index-10) OR VHI-10 OR (Voice Outcome Survey) OR (Voice Rating Scale) OR VRS OR (Voice-Related Quality of Life) OR V-RQOL OR (Voice Symptom Scale) OR VoiSS) AND ("Psychometrics"[Mesh] OR "Reproducibility of Results"[Mesh] OR "Validation Studies as Topic"[Mesh] OR "Validation Studies" [Publication Type] OR "Bias (Epidemiology)"[Mesh] OR "Observer Variation"[Mesh] OR "Selection Bias"[Mesh] OR "Diagnostic Errors"[Mesh] OR "Dimensional Measurement Accuracy"[Mesh] OR “Predictive Value of Tests"[Mesh] OR "Discriminant Analysis"[Mesh]) | NA | 676 |
| **Free Text** | **Embase**:((Evaluation of the Ability to Sing Easily) OR EASE OR (Glottal Function Index) OR (GFI) OR (Singing Voice Handicap Index) OR SVHI OR (Singing Voice Handicap Index-10) OR SVHI-10 OR (Transgender Self-Evaluation Questionnaire) OR TSEQ OR (Transsexual Voice Questionnaire - Male to Female) OR TVQ-MtF OR (Voice Index) OR (Vocal Fatigue Index) OR VFI OR (Vocal Performance Questionnaire) OR VPQ OR (Voice Capabilities Questionnaire) OR VCQ OR (Voice Disability Coping Questionnaire) OR VDCQ OR (Voice Handicap Index) OR VHI OR (Voice Handicap Index-10) OR VHI-10 OR (Voice Outcome Survey) OR (Voice Rating Scale) OR VRS OR (Voice-Related Quality of Life) OR V-RQOL OR (Voice Symptom Scale) OR VoiSS) AND (psychometric* OR reliabilit* OR validit* OR reproducibilit* OR bias).ti,ab.) | Publication date:  2016 – Current | 33 |
| **PubMed**: ((Evaluation of the Ability to Sing Easily) OR EASE OR (Glottal Function Index) OR (GFI) OR (Singing Voice Handicap Index) OR SVHI OR (Singing Voice Handicap Index-10) OR SVHI-10 OR (Transgender Self-Evaluation Questionnaire) OR TSEQ OR (Transsexual Voice Questionnaire - Male to Female) OR TVQ-MtF OR (Voice Index) OR (Vocal Fatigue Index) OR VFI OR (Vocal Performance Questionnaire) OR VPQ OR (Voice Capabilities Questionnaire) OR VCQ OR (Voice Disability Coping Questionnaire) OR VDCQ OR (Voice Handicap Index) OR VHI OR (Voice Handicap Index-10) OR VHI-10 OR (Voice Outcome Survey) OR (Voice Rating Scale) OR VRS OR (Voice-Related Quality of Life) OR V-RQOL OR (Voice Symptom Scale) OR VoiSS) AND (psychometric*[Title/Abstract] OR reliabilit*[Title/Abstract] OR validit*[Title/Abstract] OR reproducibilit*[Title/Abstract] OR bias[Title/Abstract]) | Publication date:  2016/01/01 to 2016/11/22 | 73 |

Supplementary Table 3. *Quality criteria for psychometric properties (22, 23).*

| **Property** | **Scorea** | **Quality criteriab** |
| --- | --- | --- |
| Internal consistency | + | Factor analyses performed on adequate sample size (7 * # items and ≥ 100) AND Cronbach’s alpha(s) calculated per dimension AND Cronbach’s alpha(s) between 0.70 and 0.95; IRTe |
| ? | No factor analysis OR doubtful design or method |
| - | Cronbach’s alpha(s) <0.70 or >0.95, despite adequate design and method; IRTe |
| ± | Conflicting results |
| NR | No information found on internal consistency |
| NE | Not evaluated |
| Reliability  (inter-rater reliability, intra-rater reliability, repeated measurement) | + | ICC or weighted Kappa ≥ 0.70 |
| ? | Doubtful design or method (e.g., time interval not mentioned) |
| - | ICC or weighted Kappa < 0.70, despite adequate design and method |
| ± | Conflicting results |
| NR | No information found on reliability |
| NE | Not evaluated |
| Measurement errorc | + | MIC < SDC OR MIC outside the LOA OR convincing arguments that agreement is acceptable |
| ? | Doubtful design or method OR (MIC not defined AND no convincing arguments that agreement is acceptable) |
| - | MIC ≥ SDC OR MIC equals or inside LOA, despite adequate design and method |
| ± | Conflicting results |
| NR | No information found on agreement |
| NE | Not evaluated |
| Content validity | + | A clear description is provided of the measurement aim, the target population, the concepts that are being measured, and the item selection AND target population and (investigators OR experts) were involved in item selection |
| ? | A clear description of above-mentioned aspects is lacking OR only target population involved OR doubtful design or method |
| - | No target population involvement |
| ± | Conflicting results |
| NR | No information found on target population involvement |
| NE | Not evaluated |
| Structural validity | + | Factors should explain at least 50% of the variance; IRTf |
| ? | Explained variance not mentioned |
| - | Factors explain < 50% of the variance; IRTf |
| ± | Conflicting results |
| NR | No information found on structural validity |
| NE | Not evaluated |
| Hypothesis testingd | + | Specific hypotheses were formulated AND at least 75% of the results are in accordance with these hypotheses |
| ? | Doubtful design or method (e.g., no hypotheses) |
| - | Less than 75% of hypotheses were confirmed, despite adequate design and methods |
| ± | Conflicting results between studies within the same manual |
| NR | No information found on hypotheses testing |
| NE | Not evaluated |
| Criterion validity | + | Convincing arguments that gold standard is “gold” AND correlation with gold standard ≥0.70 |
| ? | No convincing arguments that gold standard is “gold” OR doubtful design or method |
| - | Correlation with gold standard <0.70, despite adequate design and method |
| ± | Conflicting results |
| NR | No information found on criterion validity |
| NE | Not evaluated |
| Responsiveness | + | SDC or SDC < MIC OR MIC outside the LOA OR RR > 1.96 OR AUC ≥ 0.70 |
| ? | Doubtful design or method |
| - | SDC or SDC ≥ MIC OR MIC equals or inside LOA OR RR ≤ 1.96 OR AUC < 0.70, despite adequate design and methods |
| ± | Conflicting results |
| NR | No information found on responsiveness |
| NE | Not evaluated |

a Scores: + = positive rating; ? = indeterminate rating; - = negative rating; ± = conflicting data; NR = not reported; NE = not evaluated (for study of poor methodological quality according to COSMIN rating; data are excluded from further evaluation).

b Doubtful design or method = no clear description of the design or methods of the study, sample size smaller than 50 subjects (should be at least 50 in every (subgroup) analysis), or any important methodological weakness in the design or execution of the study.

c Measurement error: MIC = minimal important change; SDC = smallest detectable change; LOA = limits of agreement.

d Hypothesis testing: all correlations should be statistically significant (if not, these hypotheses are not confirmed) AND these correlations should be at least moderate (r > 0.5).

e For IRT (as defined by the current authors): + Person Separation Index > 2 OR person reliability values ≥0.8; - Person Separation Index ≤2 OR person reliability values <0.8

f For IRT (as defined by the current authors): + 1) Principal Component Analysis (PCA) of residuals: >60% of the variance explained by Rasch factor OR 2) Eigenvalue <3 on 1st contrast OR 1st contrast explains < 10% of the variance OR 3) (Overall item and person infit and outfit fit reported as a MnSq >0.7 or < 1.4, and outfit Z-STD values < ±2) AND (positive point-biserial correlations); - If none of the criteria 1) to 3) are met.

Supplementary Table 4. *Overview of dysphonia related FHS and HR-QoL questionnaires: reasons for exclusion.*

| **No.** | **Questionnaire** (alphabetical order) | **Acronym** | **Exclusion** |
| --- | --- | --- | --- |
| 1 | Behavior Assessment Battery (51) | BAB | Not a measure of FHS and/or HR-QoL in dysphonia |
| 2 | Category Ratio scale (52) | CR-10 | Not a comprehensive measure |
| 3 | BORG CR-10 adapted for Vocal Effort Ratings (53) | N/A | Not a comprehensive measure |
| 4 | Children’s Voice Handicap Index (54) | CVHI-10 | Different target population |
| 5 | Classical Singing Handicap Index (55) | CSHI | Not developed in English |
| 6 | Communicative Participation Item Bank (56) | CPIB | Not a measure of FHS and/or HR-QoL in dysphonia |
| 7 | Condição de Produção Vocal – Professor (Vocal Production Condition – Teacher) (57) | CVV-P (CPV-T) | Not developed in English |
| 8 | Disease-specific Self-Efficacy Spasmodic Dysphonia Scale (58) | SE-SD | Not a measure of FHS and/or HR-QoL in dysphonia |
| 9 | Dysphonia Risk Screening Protocol (59) | DRSP | Not a measure of FHS and/or HR-QoL in dysphonia |
| 10 | Dysphonia Severity Index (60) | DSI | Not a measure of FHS and/or HR-QoL in dysphonia |
| 11 | Glasgow Benefit Index (61) | GBI | Not a measure of FHS and/or HR-QoL in dysphonia |
| 12 | Glasgow Children’s Benefit Inventory (62) | GCBI | Not a measure of FHS and/or HR-QoL in dysphonia |
| 13 | Goldman Voice Use Survey (63) | N/A | Not a measure of FHS and/or HR-QoL in dysphonia |
| 14 | Iowa Patient’s Voice Index (IPVI) (64) | IPVI | Not a comprehensive measure |
| 15 | Iranian Voice Quality of Life Profile (65) | IVQLP | Not developed in English |
| 16 | Levels of Speech Usage scale (66) | N/A | Not a measure of FHS and/or HR-QoL in dysphonia |
| 17 | Linear Analog Scale of Assessment Voice Quality (67) | LASA-VQ | Not a comprehensive measure |
| 18 | Living with Dysarthria (68, 69);  Questionário Vivendo com Disartria (VcD; Spanish versión) | LwD (VcD) | Not a measure of FHS and/or HR-QoL in dysphonia |
| 19 | Manchester Short Assessment of Quality of Life (70) | MANSA | Not a measure of FHS and/or HR-QoL in dysphonia |
| 20 | Modern Singing Handicap Index  (Índice de Desvantagem para o Canto Moderno) (71) | MSHI (IDCM) | Not developed in English |
| 21 | Occupational Voice Demands Scale (72) | N/A | Not a measure of FHS and/or HR-QoL in dysphonia |
| 22 | Pediatric Voice Handicap Index (73) | pVHI | Different target population |
| 23 | Pediatric Voice Outcome Survey (74) | Paediatric VOS | Different target population |
| 24 | Pediatric Voice-Related Quality-of-Life Survey (75) | PVRQOL | Different target population |
| 25 | Quality of Life Questionnaire – Voice Clinic Questionnaire (76) | N/A | Not a comprehensive measure |
| 26 | Rastrea-mento de Alteraçðes Vocais em Idosos  (Screening for Voice Disorders in Older Adults) (77) | RAVI | Not developed in English |
| 27 | Scleroderma Logopedic Scale (78) | SLS-Voice | Not a self-reported measure |
| 28 | Self-rating scale of vocal impairment (79) | SRS | No comprehensive measure |
| 29 | Sheehan Disability Scale (80) | SDS | Not a measure of FHS and/or HR-QoL in dysphonia |
| 30 | Singers’s Vocal Behaviours Questionnaires (81) | Q-SinVocHab | Not developed in English |
| 31 | South Manchester University Hospitals NHS Trust: Voice Rating Scale (82) | N/A | Not a comprehensive measure |
| 32 | Speech Disability Questionnaire (83) | SDQ | Different target population |
| 33 | Stanford Presenteeism Scale 6 (84) | SPS-6 | Not a measure of FHS and/or HR-QoL in dysphonia |
| 34 | Symptom-specific questionnaire for patients with recurrent papillomatosis (85) | N/A | Not a comprehensive measure |
| 35 | Survey on teaching performing (86) | N/A | Not a measure of FHS and/or HR-QoL in dysphonia |
| 36 | Thyroidectomy Related Voice Questionnaire (87) | TVQ | Not developed in English |
| 37 | Unified Spasmodic Dysphonia Rating Scale (88) | USDRS | Not a self-reported measure |
| 38 | University of Rhode Island Change Assessment– Voice (89) | URICA-Voice | Not a measure of FHS and/or HR-QoL in dysphonia |
| 39 | Visual Analogue Scale – Voice/ Three Item Outcome Scale (90) | VAS-voice | Not a comprehensive measure |
| 40 | Vocal Fatigue Handicap Questionnaire (91) | VFHQ | Not developed in English |
| 41 | Vocal Tract Discomfort Scale (92) | VTD | Not a measure of FHS and/or HR-QoL in dysphonia |
| 42 | Voice Activity and Participation Profile (93) | VAPP | Not developed in English |
| 43 | Voice Disorder Outcome Profile (94) | Voice-DOP | Not developed in English |
| 44 | Voice Handicap Index-12 (Stimmstörungsindex) (95) | VHI-12 (SSI) | Not developed in English |
| 45 | Voice Handicap Index-13 (96) | VHI-13 | Not developed in English |
| 46 | Voice Handicap Index-Partner (97) | VHI-P | Not a self-reported measure |
| 47 | Voice Handicap Index-Throat (98) | VHI-T | Not developed in English |
| 48 | Voice Problems Self-Assessment Scale (99) | VPSS | Not developed in English |
| 49 | Voice-Related Statements (84) | VRS | Not a comprehensive measure |
| 50 | Voice Self-Efficacy Questionnaire (100) | VSEQ | Not a measure of FHS and/or HR-QoL in dysphonia |
| 51 | Voice Outcome Survey (101) | VOS | Not a comprehensive measure |
| 52 | Work Productivity And Impairment:  Specific Health Problem (102) adapted for hoarseness and voice disorders (103) | WPAI-SHP* | Not a measure of FHS and/or HR-QoL in dysphonia |

*Notes*. No = number; N/A = Not Applicable (no acronym); *Adapted for hoarseness and voice disorders

Supplementary Table 5. *Studies for the development and validation of questionnaires assessing FHS and/or HR-QoL in dysphonia.*

| **Questionnaire**  *(alphabetical order)* | **Reference** | **Purpose of study** | **Study population** | **Age (range [R] and/or Mean [MN] and/or Standard Deviation [SD])** |
| --- | --- | --- | --- | --- |
| Evaluation of the Ability to Sing Easily (EASE) | Phyland, Pallant (30) | To devise, test and validate a scale to assess singer’s perceptions of current status of the physical functioning of their singing voice | N = 284: professional music theatre singers (F = 157; M = 127);  Age groups: ≤17y (n = 5), 18-20y (n = 12), 21-29y (n = 137), 30-39y (n = 79), 40-49y (n = 41), 50-59y (n = 10) | R = 17-59y, MN = NR, SD = NR |
| Phyland, Pallant (104) | To use EASE to assess professional music theatre singers’ perceptions of current singing voice status and to compare scores across demographic and performance characteristics and to evaluate the construct validity (known-groups validity) of the EASE and its subscales. | N = 284: professional music theatre singers (F = 157; M = 127);  Age groups: 17-20y (n = 17), 21-29y (n = 137), 30-39y (n = 79), 40-49y (n = 41), 50-59y (n = 10) | R= 17-59y, MN = NR, SD = NR |
| Glottal Function Index (GFI) | Bach, Belafsky (31) | To test the reproducibility, specificity and construct validation of the GFI (correlation with VHI) | N = 200; (I) n = 40: patients undergoing laryngoplastic phonosurgery due to glottic insufficiency; (II) n = 40: nodules; (III) n = 40: spasmodic dysphonia (IV) n = 40: granuloma; (V) n = 40: controls (F = 20; M = 20) | (I) R = NR, Med = 49y, SD = NR; (II - IV) R = NR, MN = NR, SD = NR; (V) R = NR, Med = 39y, SD = NR |
| Buckmire, Bryson (105) | To determine the effectiveness of gore-tex medialisation thyroplasty for the management of glottic incompetence in patients with mobile vocal folds and to evaluate the construct validation of GFI (correlation with VRQ & GRBAS) | N = 22: patients with glottis incompetence and mobile vocal folds treated surgically with gore-tex medialisation thyropolasty (F = 12; M = 8) | R = 19-85y, MN = 48 y, SD = NR |
| Singing Voice Handicap Index (SVHI) | Castelblanco, Habib (106) | To evaluate the relationship between perceived singing voice health as measured by the SVHI and videostroboscopy findings in healthy professional singers. | N = 47: adult self-reported vocally-healthy professional singers (F = NR; M = NR) | R = 19-62y, MN = 31y, SD = NR |
| Cohen, Jacobson (32) | To create and validate a singer self-report scale to evaluate the impact of a voice problem on their quality of life | N = 241; (I) n = 112: dysphonic singers (F = 67; M = 45); (II) n = 129: normal singers (F = NR; M = NR) | (I) R = 16-67y, MN = 35.3y, SD = NR; (II) R = NR, MN = NR, SD = NR |
| Singing Voice Handicap Index-10 (SVHI-10) | Cohen, Statham (33) | Prospective item analysis of the SVHI and creation and testing of the shortened SVHI and correlation with VHI | N = 297; (I) n= 91: treatment-seeking singers with singing voice problems (F = 62; M = 29); (II) n = 99: non-treatment seeking singers (F = 70; M = 29) | (I) R = 18-33y, MN = 40y, SD = NR; (II) R = 18-80y, MN = 39.5y, SD = NR |
| Transgender Self-Evaluation Questionnaire (TSEQ) | Hancock, Krissinger (107) | To explore relationships between self-perceived quality of life and perceptions of femininity and likability associated with transgender voice | N = 20: male to female transgender individuals | R = 23–63y, MN = 45.8y, SD= 10.6 |
| Hancock (108) | To describe the voice-related quality of life of a diverse group of transgender women using the ICF framework | N = 32: transgender women | R = 19-80y, MN = 43 y, SD = 15  (*Note*: data from N = 81 transgender women, but no specific data for subgroup N = 32) |
| Transsexual Voice Questionnaire - Male to Female (TVQMtF) | Dacakis, Davies (35) | The development and preliminary psychometric evaluation of the TVQMtF | N = 35: male to female transsexuals | R = 29.8–67.0y, MN = 52.90y, SD = NR |
| Vocal Fatigue Index (VFI) | Nanjundeswaran, Jacobson (36) | The development and preliminary psychometric evaluation of the VFI, to help identify individuals with vocal fatigue and characterise their complaints | N = 200 (Stage: Index development and initial testing): (I) patients presenting to voice clinics (F = 127; M = 73)  N = 175 (Stage: Validation of VFI): (II) n = 105: voice patients (F = 70; M = 35); (III) n = 70: vocally healthy individuals (F = 49; M = 21) | (I) R = NR, MN = ±51y, SD ≈16-20y; (II) R = NR, MN = 50y, SD = 16; (II) R = NR, MN = 39y, SD = 15 |
| Vocal Performance Questionnaire (VPQ) | Carding and Horsley (37) | To evaluate the effectiveness of both direct and indirect therapy in the treatment of non-organic dysphonia and survey individual patient responses to these approaches | N = 30: treatment-seeking patients with non-organic dysphonia (F = 23, M = 7); (I) n = 10: direct therapy (F = 8, M = 2); (II) n = 10: indirect therapy (F = 8, M = 2); (III) n = 10: No therapy (F = 7, M = 3) | (I) R = 22-48y, MN = 38.8y, SD = NR; (II) R = 18-76y, MN = 50.1y, SD = NR; (II) R = 18-75y MN = 44.3y, SD = NR |
| Deary, Webb (109) | To evaluate the psychometric properties and clinical usefulness of the VHI-10 and the VPQ in the laryngology office setting | N = 330: dysphonic voice clinic attendees (F = 222, M = 108) | (Males) R = 23-88y, MN = 55.2y, SD = 15.5; (Females) R =17-87y, MN = 48.2y, SD= 17.5 |
| Webb, Carding (110) | To evaluate the reliability and validity of the VPQ, VHI and the VoiS | N = 170: voice clinic patients (F = 127, M = 54) | R = 18-88y, MN= 52 y, SD = NR |
| Voice Capabilities Questionnaire (VCQ) | Buckley, O'Halloran (38) | To explore the occupational voice use and vocal health of elite football coaches | N = 12: Australian football coaches (F = 0, M = 12) | R = 32-48y, MN = 39y, SD= 6.7 |
| Voice Disability Coping Questionnaire (VDCQ) | Epstein, Hirani (39) | To explore and validate the VDCQ | N = 80 (F = 52, M = 28): (I) n = 40: voice clinic patients with adductor spasmodic dysphonia (F = 23, M = 17); (II) n = 40: patients with muscle tension dysphonia (F = 29, M = 11) | Total group: R = NR, MN = 45.4y, SD = NR; (I) R = NR, MN = 49.70y, SD = 16.28; (II) R = NR, MN = 41.31y, SD = 19.57 |
| Voice Handicap Index (VHI) | Arffa, Krishna (45) | To establish normative data for the VHI-10 (extracted from the VHI) | N = 190 (F = NR, M = NR): (I) nVHI = 156 (F = 106, M = 50): (II) nVHI-10 = 163 (F = 110, M = 48): family members of otolaryngology patients without voice complaints | R = NR, MN = NR, SD = NR |
| Awan, Roy (111) | To examine the strength of relationships between acoustic measures, the Cepstral Spectral Index of Dysphonia (CSID) and the total VHI score in voice- disordered and control subjects | N = 332 (F = 216, M = 116): (I) n = 258: voice-disordered patients; (II) n = 74: normophonic control subjects | R = 15–87y, MN = 51.94y, SD= 16.22 |
| Bach, Belafsky (31) | To test the reproducibility, specificity and construct validation of the GFI (correlation with VHI) | N = 200; (I) n = 40: patients undergoing laryngoplastic phonosurgery due to glottic insufficiency; (II) n = 40: nodules; (III) n = 40: spasmodic dysphonia (IV) n = 40: granuloma; (V) n = 40: controls (F = 20; M = 20) | (I) R = NR, Med = 49y, SD = NR; (II - IV) R = NR, MN = NR, SD = NR; (V) R = NR, Med = 39y, SD = NR |
| Elam, Ishman (112) | To determine if a relationship exists between depression and VHI-scores in patients with laryngopharyngeal reflux disease | N = 89 treatment–seeking laryngology patients: (I) n = 36 patients with laryngopharyngeal reflux disease (F = 25, M = 11); (II) n = 53 control patients (F = 36, M = 17) | (I) R = 28–77y, MN = 54.2y, SD = NR; (II) R = 19–84y, MN = 48.2y, SD = NR |
| Ford Baldner, Doll (53) | To investigate potential relationships between the Borg Category Ratio (CR-10) for vocal effort and auditory-perceptual ratings, VHI and phonation threshold pressure | N = 56: (I) n= 28: participants with voice disorders (F = 17, M = 10, gender undisclosed = 1) (II) n = 28: healthy controls (F = 25, M = 2) | (I) R = NR, MN = 50y, SD = NR;  (II) R = NR, MN = 27y, SD = NR |
| Fulljames and Harris (113) | To compare correlations between VHI and a self-rating scale of vocal impairment (SRS) with perceptual assessment and acoustic analysis of sustained vowels and connected speech | N = 10: pre and post voice therapy (F = 10, M = 0) | R = 17-76y, MN = 52y, SD = 17.5 |
| Jacobson, Johnson (40) | To develop and validate the VHI | N = 65 (Stage: Scale development): (I) voice clinic patients (F = 40, M = 25)  N = 63 (Stage: Test-retest reliability & Relationship of VHI to voice disorder severity): (II) voice clinic patients (F = 38, M = 25) | (I) R = NR, MN = 52.3y, SD= 16.28;  (II) R = NR, MN = 49y, SD= 18 |
| Kazi, De Cordova (114) | To investigate the effect of voice impairment across the physical, emotional, and functional domains in patients using valved speech following total laryngectomy as measured by the V- RQOL and the VHI | N = 54: patients after total laryngectomy (F = 14, F = 40) | R = 37–84y, Med = 63.4y, SD = NR |
| Portone, Hapner (115) | To investigate the correlation between the VHI and the V-RQOL, and to test conversion of scores between the two instruments. | N = 140: voice-disordered patient charts | R = NR, MN = NR, SD = NR |
| Rosen, Lee (41) | To develop an abbreviated voice handicap assessment instrument and compare it with the VHI | N = 819: voice clinic patients | R = NR, MN = NR, SD = NR |
| Stomeo, Tosin (116) | To evaluate voice outcomes, in patients with early glottic cancer who underwent transoral laser cordectomy with objective and subjective (VHI and GIRBAS scale) means. | N = 24 patients with early glottic cancer who underwent transoral laser cordectomy (F = 1, M = 23) | R = 45 to 86y, Med = 66.4y, SD = NR |
| Webb, Carding (110) | To evaluate the reliability and validity of the VPQ, VHI and the VoiSS | N = 170: voice clinic patients (F = 127, M = 54) | R = 18-88y, MN= 52 y, SD = NR |
| Wheeler, Collins (117) | To examine the relationship between the VHI and acoustic measures of voice samples common in clinical practice. | N = 50: voice-disordered participants completed VHI (F = 38, M = 12)  (*Note*: n = 17 for acoustic analysis of voice) | R = 19-80y, MN = 49 yrs, SD = NR |
| Wilson, Webb (46) | To perform a substantial factor analysis of two measures of voice impairment, the VoiSS and the VHI | N = 319: voice-disordered patients (F = 220, M = 99); (II) n = 144: functional dysphonics (F = 106, M = 38); n = 145: patients with defined pathology (F = 85, M = 60) | (I) R = NR, MN = 53.4y, SD = 16.5; (II) R = NR, MN = 51.6y, SD=17.3 |
| Voice Handicap Index-10 (VHI-10) | Arffa, Krishna (45) | To establish normative data for the VHI-10 (extracted from the VHI) | N = 190 (F = NR, M = NR): (I) nVHI = 156 (F = 106, M = 50): (II) nVHI-10 = 163 (F = 110, M = 48): family members of otolaryngology patients without voice complaints | R = NR, MN = NR, SD = NR |
| Childs, Bielinski (118) | To determine if a correlation exists between the VHI-10 and the Voice Functional Communication Measure rating in the National Outcomes Measurement System (NOMS) | N = 409: treatment-seeking voice patients (F = 284, M = 125) | R= 9-90y, MN = 53.1y, SD = NR |
| Cohen, Statham (33) | Prospective item analysis of the SVHI and creation and testing of the shortened SVHI and correlation with VHI | N = 297; (I) n= 91: treatment-seeking singers with singing voice problems (F = 62; M = 29); (II) n = 99: non-treatment seeking singers (F = 70; M = 29) | (I) R = 18-33y, MN = 40y, SD = NR; (II) R = 18-80y, MN = 39.5y, SD = NR |
| Davis, Sandage (119) | To describe athlete belief of performance benefit when using voice during force production tasks and to determine if vocalisation during effortful tasks was correlated to perception of voice impairment | N = 378 athletes (F = 257, M = 121) | R=19->70y, MN = NR, SD = NR |
| Deary, Webb (109) | To evaluate the psychometric properties and clinical usefulness of the VHI-10 and the VPQ in the laryngology office setting | N = 330: dysphonic voice clinic attendees (F = 222, M = 108) | (Males) R = 23-88y, MN = 55.2y, SD = 15.5; (Females) R =17-87y, MN = 48.2y, SD= 17.5 |
| Eadie, Lamvik (120) | To determine how the self-report outcome measure, the Communicative Participation Item Bank (CPIB), relate to disease- and discipline-specific quality of life outcomes in a head and neck cancer population. | N = 195: individuals treated for head and neck cancer (F = 76, M = 119) | M=61yrs, SD=12.3, R= 24-86 |
| Gillespie, Gooding (121) | To correlate change in VHI-10 scores with corresponding voice laboratory measures across five voice disorders. | N = 150: voice clinic patients with primary diagnosis of vocal fold lesions, primary muscle tension dysphonia-1, atrophy, unilateral vocal fold paralysis and scar. | R = NR (>18y), MN = NR, SD = NR |
| Hu, Hillel (122) | To identify and quantify patient perception of perceived hoarseness and impact in spasmodic dysphonia patients. | N = 139: patients with adductor spasmodic dysphonia (F = 106, M = 33) | R = NR, MN = 59.6y, SD= 13.7 |
| Kupfer, Cadalli Tatar (123) | To determine whether the Derkay score for quantifying papillomatosis positively correlates with the VHI-10 | N = 46: recurrent respiratory papillomatosis patients (F = 10, M = 36) | R = NR, MN = NR, SD = NR |
| Nichols, Bock (124) | To identify prevalence of dysphonia in nursing home residents and assisted living residents and search for correlations between VHI-10 and indices of frailty. | N = 119 people in residential care (assisted care and nursing homes);  Age groups: 65-75 (n = 35), 76-85 (n = 16), >85 (n = 68) | R= 65->85y, MN=NR, SD = NR |
| Romak, Orbelo (125) | To examine the correlation between two voice-specific patient-reported outcome measures: VHI-10 and V-RQOL | N = 804 voice clinic patients (F = 478, M = 326) | R = NR, MN = 58.6y, SD=16.3 |
| Rosen, Lee (41) | To develop an abbreviated voice handicap assessment instrument and compare it with the VHI | N = 819: voice clinic patients | R = NR, MN = NR, SD = NR |
| Stachler, Schultz (126) | to evaluate the Patient-Reported Outcomes Measure Information System (PROMIS) in a head and neck cancer patient cohort by assessing the associations with other measures | N = 39: head and neck patients (F = 10, M = 29) | R = 42-91y, MN = 58.5y, SD=7.7 |
| Willis, Michael (127) | To assess the prevalence and severity of dysphonia in patients with cystic fibrosis sinusitis according to patient-reported outcome measures and auditory-perceptual evaluation | N = 37: participants; (I) n = 17 patients with CF sinusitis; (II) n = 10 patients with non-CF sinusitis; (II) n = 10 healthy individuals | (I) R =18-58y, MN = 30.4y, SD = NR; (II) R = 22-62y, MN = 41.9y, SD = NR; (II) R = 28-37y, MN = 31.3y, SD = NR |
| Voice Rating Scale (VRS) | Jones, Carding (82) | To explore whether severity and/or consistency of dysphonia are linked to voice-related quality of life | N = 60: voice clinic patients (F = 36, M = 24) | (Males) R 24–83y, MN = 61.8y, SD = NR; (Females) R = 26–86y, MN = 54.2y, SD = NR |
| Wingate, Brown (42) | To examine treatment outcomes of two specific rehabilitation programs for a group of professional voice users | N = 18: dysphonic treatment-seeking professional voice-users (F = 10, M = 8): (I) n = 9: benign vocal fold lesions; (II) n = 9: symptoms of throat pain or vocal fatigue | Total group: (Males) R= 27-59y, MN = 46y, SD = NR; Total group: (Females) R = 25-59y, MN = 39y, SD = NR |
| Voice-Related Quality of Life (V-RQOL) | Bornbaum, Day (128) | To evaluate the construct validity of the V-RQOL measure in a sample of individuals who have undergone total laryngectomy | N =109: laryngectomised persons | R = 34-88y, MN = 63.38y, SD = NR |
| Buckmire, Bryson (105) | To determine the effectiveness of gore-tex medialisation thyroplasty for the management of glottic incompetence in patients with mobile vocal folds and to evaluate the construct validation of GFI (correlation with VRQ & GRBAS) | N = 22: patients with glottis incompetence and mobile vocal folds treated surgically with gore-tex medialisation thyropolasty (F = 12; M = 8) | R = 19-85y, MN = 48 y, SD = NR |
| Hogikyan and Sethuraman (43) | To develop and validate a clinically useful instrument for measuring voice-related quality of life | N = 31: (I) n = 109: voice patients; (II) n = 22: non-voice patients  22 non-voice patients. | (I) R = 19-85y, MN = 51.2y, SD = NR; (II) R = 19-84, MN = 49.9y, SD = NR |
| Karnell, Melton (64) | To test reliability and construct validity of the IPVI with GRBAS, CAPE-V and V-RQOL | N = 103: treatment-seeking voice disordered patients (F = 61, M = 42);  Age groups: 17-29y (n = 15), 30-39y (n = 12), 40-49y (n = 25), 50-59y (n = 16), 60-69y (n = 12), 70-79y (n = 14), >80y (n = 9) | R=17->80, MN = NR, SD = NR |
| Kazi, De Cordova (114) | To investigate the effect of voice impairment across the physical, emotional, and functional domains in patients using valved speech following total laryngectomy as measured by the V- RQOL and the VHI | N = 54: patients after total laryngectomy (F = 14, F = 40) | R=37–84y, Med = 63.4y, SD = NR |
| Kupfer, Hogikyan (129) | To establish a large, heterogenous V-RQOL normative database. | N = 253: people who did not perceive themselves to have a voice problem (F = 170, M = 83) | R= 18-94y, MN = 40.9y, SD = NR |
| Murry, Medrado (130) | To determine the relationship between the patient’s perception of voice related quality of life using the V-RQOL and the clinician’s perception of voice severity using the GRBAS | N = 95: (I) n = 50 patients with a complaint of a voice disorder (F = 29, M = 21); (II) n = 45 (F = 26, M = 19): control group without voice complaints | (I) R = 22-90y, M = 59.7y; (II) R = 25-90y, MN = 53.4y |
| Portone, Hapner (115) | To investigate the correlation between the VHI and the V-RQOL, and to test conversion of scores between the two instruments. | N = 140: voice—disordered patient charts | R = NR, MN = NR, SD = NR |
| Romak, Orbelo (125) | To examine the correlation between two voice-specific patient-reported outcome measures: VHI-10 and V-RQOL | N = 804 voice clinic patients (F = 478, M = 326) | R = NR, MN = 58.6y, SD=16.3 |
| Tanner, Pierce (131) | To examine quality of life burden of voice disorders in Sjögren’s syndrome | N = 101: patients with Sjögren’s syndrome | R = 20-93y, MN = 59.4y, SD = 14.1 |
| Voice Symptom Scale (VoiSS) | Deary, Wilson (44) | To devise and validate a patient- derived inventory of voice symptoms for use as a sensitive assessment tool of baseline pathology and response to change in adult dysphonia clinics | N = 180 (Final stage): voice-disordered treatment-seeking patients (F = 117, M = 63) | (Females) R = NR, MN = 53.4y, SD = 16.0; (Males) R = NR, MN = 55.4y, SD=14.0 |
| Jones, Carding (82) | To explore whether severity and/or consistency of dysphonia are linked to voice-related quality of life. | N = 60: voice clinic patients (F = 36, M = 24) | (males) R 24–83y, MN = 61.8y, SD = NR; (females) R = 26–86y, MN = 54.2y, SD = NR |
| Montgomery, Hendry (132) | To evaluate diagnostic performance of the emotional domain of the VoiSS questionnaire compared with the Hospital Anxiety and Depression Scale (HADS) | N = 177: voice clinic patients (F = 125, M = 52)  (*Note*: 177 from 210 consecutive patients) | R= 18–90y, MN = 56.0y, Med = 57.2y, SD = NR |
| Webb, Carding (110) | To evaluate the reliability and validity of the VPQ, VHI and the VoiSS | N = 170: voice clinic patients (F = 127, M = 54) | R = 18-88y, MN= 52 y, SD = NR |
| Wilson, Webb (46) | To perform a substantial factor analysis of two measures of voice impairment, the VoiSS and the VHI | N = 319: voice-disordered patients (F = 220, M = 99); (II) n = 144: functional dysphonics (F = 106, M = 38); n = 145: patients with defined pathology (F = 85, M = 60) | (I) R = NR, MN = 53.4y, SD = 16.5; (II) R = NR, MN = 51.6y, SD=17.3 |

*Note*. N = total sample size; n = subgroups; R = range; MN = mean; Med = median; NR = not reported; SD = standard deviation; M = male; F = female

Supplementary table 6. *Characteristics of the questionnaires for the assessment of FHS and/or HR-QoL in dysphonia.*

| **Questionnaire**  ***(alphabetical order)*** | **Purpose of instrument** | **Published year** | **Scale titles**  **(number of items)** | **Number of scales (total number of items); Range of score** | **Response Options** |
| --- | --- | --- | --- | --- | --- |
| Evaluation of the Ability to Sing Easily (EASE) (30) | Self-report singing voice function scale | 2014 | EASE (22);  Subscales Vocal Fatigue (10), Pathological-Risk Indicator (10), Vocal Concern (2) | 3 (22); Range: 22-88 | 4-point ordinal scale (1-4:  not at all, mildly, moderately, extremely) |
| Glottal Function Index (GFI) (31) | Self-report symptom impairment due to glottic insufficiency | 2005 | Glottic Function Index (4) | 1 (4): Range: 0-20 | 6-point ordinal scale (0-5: no problem to severe problem) |
| Singing Voice Handicap Index (SVHI) (32) | Voice-related health status questionnaire for singers with voice problems | 2007 | Singing Voice Handicap Index (36) | 1 (36); Range: 0-144 | 5-point ordinal scale (0-4: never to always) |
| Singing Voice Handicap Index-10 (SVHI-10) (33) | Shortened version of the Singing Voice Handicap Index (SVHI). | 2009 | SVHI-10 (10) | 1 (10); Range: 0-40 | 5-point ordinal scale (0-4: never to always) |
| Transgender Self-Evaluation Questionnaire (TSEQ) (34) | Self-report HR-QoL measure for impact of voice issues tailored to the transgender population | 2006 | TSEQ (30):  Subscales Functional (11), Physical Score (10), Emotional Score (9);  (TSEQ Overall (2): separate from TSEQ) | 3 (30); Range: 30-150  (TSEQ Overall: NA) | 5-point ordinal scale (1-5: never to always);  (TSEQ Overall: 5 categorical descriptors) |
| Transsexual Voice Questionnaire - Male to Female (TVQMtF) (35) | Self-reported perceptions of MtF transsexuals regarding their voice | 2013 | TVQMtF (30) | 1 (30); Range: 30-120 | 4-point ordinal scale (1-4: never, rarely, usually, always). |
| Vocal Fatigue Index (VFI) (36) | Self-report scale for identifying and characterising the degree and nature of vocal fatigue symptoms | 2015 | VFI (19):  Subscales Tiredness and avoidance of voice (11), Physical discomfort (5), Improvement of symptoms with rest (3) | 3 (19); Range: 0-76 | 5-point ordinal scale (0-4: never, almost never, sometimes, almost always, always) |
| Vocal Performance Questionnaire (VPQ) (37) | Self-rated survey of patient perceptions of their own vocal performance | 1992 | VPQ (12) | 1 (12); Range 12-60 | 5-point ordinal scales (a-e: normal voice to severely limited) |
| Voice Capabilities Questionnaire (VCQ) (38) | Self-rated inventory related to perceived vocal health at work | 2015 | VCQ (16)  (Voice problem (1-2): separate from VCQ) | 1 (16); Range: 16-80  (Voice problem: NA) | 5-point ordinal scale (1-5: never to always)  Voice problem: mixed (binary score: yes/no; if yes, 5-point ordinal scale (1-5): slight to severe) |
| Voice Disability Coping Questionnaire (VDCQ) (39) | Voice-specific measure to evaluate how patients cope with voice problems. | 2009 | VDCQ (15):  Subscales Social Support (6), Passive coping (4) Avoidance (3), Information- Seeking (2) | 4 (15); Range 0-75 | 6-point ordinal scale (0-5: never to always) |
| Voice Handicap Index (VHI or VHI-30) (40) | Self-report instrument to quantify the perception of psychosocial and voice-related quality of life impact of a voice problem | 1997 | VHI (30)  Subscales Emotional (10), Functional (10). Physical (10) | 3 (30); Range 0-120 | 5-point ordinal scale (0-4: none to always) |
| Voice Handicap Index-10 (VHI-10) (41) | Abbreviated voice handicap assessment instrument to quantify the perception of impact of a voice disorder on voice-related quality of life | 2004 | VHI-10 (10)  No subscales, but items are identified as Emotional (2), Functional (5) and Physical (3) | 1 (10); Range 0-40 | 5-point ordinal scale (0-4: never to always) |
| Voice Rating Scale (VRS) (42) | Self-rating of vocal function in voice-related work activities | 2007 | VRS (10) | 1 (10); Range 0 – 1000? | Visual Analogue scale (mild to moderate to severe) |
| Voice-Related Quality of Life (V-RQOL) (43) | Self-report scale for evaluation of the perceived impact of a voice disorder on a person’s quality of life | 1999 | Total (10):  Subscales Physical Functioning (6), Social-emotional (4) | 2 (10); Range 0-100 (domain and total V-RQOL converted raw scores to standardised scores) | 5-point ordinal scales (0-5: none/not a problem to problem is as ‘bad it can be’). |
| Voice Symptom Scale (VoiSS) (44) | Self-report tool to assess symptoms and psychosocial impact of voice disorders patient- derived items. | 2003 | Total (30):  Subscales Impairment (15), Emotional (8), Physical (7) | 3 (10); Range (0-120) | 5-point ordinal scales (0-4: never to always) |

Supplementary Table 7. *Methodological quality assessment of studies on psychometric properties of FHS and/or HR-QoL questionnaires in dysphonia.*

| **Questionnaire**  *(alphabetical order)* | **Reference** | **Measurement property: methodological quality per study** | | | | | |
| --- | --- | --- | --- | --- | --- | --- | --- |
| **Internal Consistency** | **Reliability** | **Measurement Error** | **Content Validity** | **Structural Validity** | **Hypothesis Testing** |
| Evaluation of the Ability to Sing Easily (EASE) | Phyland, Pallant (30) | Excellent (85.7%) | NR | NR | Good (71.4%) | Excellent (75.0%) | NR |
| Phyland, Pallant (104) | Excellent (81.0%) | NR | NR | NR | NR | Divergent (Gender) Fair (47.1%)  Divergent (Age) Fair (47.1%)  Divergent (Self-reported voice problem)  Fair (41.2%)  Divergent (Currently performing) Fair (41.2%) |
| Glottal Function Index (GFI) | Bach, Belafsky (31) | NR | *Intra-rater*  Good (51.7%) | NR | NR | NR | *Convergent (VHI)*  Fair (30.4%) |
| Buckmire, Bryson (105) | NR | NR | NR | NR | NR | *Convergent (V-RQOL)*  Fair (39.1%) |
| Singing Voice Handicap Index (SVHI) | Castelblanco, Habib (106) | NR | NR | NR | NR | NR | Convergent (Videostroboscopy) Fair (47.8%) |
| Cohen, Jacobson (32) | Good (66.7%) | Good (62.1%) | NR | Good (50.0%) | Fair (50.0%) | Convergent (VAS) Fair (43.5%)  Divergent (self-reported diagnosis) Fair (35.3%) |
| Singing Voice Handicap Index-10 (SVHI-10) | Cohen, Statham (33) | Good (60.0%) | Good (58.6%) | NR | Fair (50.0%) | NR | Convergent (VHI-10)  Fair (34.8%)  Convergent (Self-reported voice disorder)  Fair (35.3%) |
| Transgender Self-Evaluation Questionnaire (TSEQ) | Hancock, Krissinger (107) | NR | NR | NR | NR | NR | *Convergent (Femininity Self-rate)*  Fair (43.5%)  *Convergent (Likeability Self-rate)*  Fair (43.5%)  *Convergent (Femininity Listener-rate)*  Fair (43.5%)  *Convergent (Likeability Listener-rate)*  Fair (43.5%) |
| Hancock (108) | NR | NR | NR | NR | NR | *Convergent (VHI)*  Good (52.2%) |
| Transsexual Voice Questionnaire - Male to Female (TVQMtF) | Dacakis, Davies (35) | Good (52.0%) | *Test-retest*  Excellent (86.2%) | NR | NR | NR | NR |
| Vocal Fatigue Index (VFI) | Nanjundeswaran, Jacobson (36) | Excellent (85.7%) | *Test-retest*  Good (72.4%) | NR | Excellent (78.6%) | Good (66.7%) | *Divergent*  Good (58.8%) |
| Vocal Performance Questionnaire (VPQ) | Carding and Horsley (37) | NR | NR | NR | NR | NR | *Convergent (Buffalo III)*  Good (56.5%) |
| Deary, Webb (109) | Fair (36.0%) | NR | NR | NR | Fair (44.4%) | *Convergent (VHI-10)*  Fair (43.5%) |
| Webb, Carding (110) | Good (63.9%) | *Intra-rater*  Excellent (75.9%) | NR | NR | NR | *Convergent (VHI)*  Good (52.2%)  *Convergent (VoiSS)*  Good (52.2%)  *Convergent (GRBAS)*  Good (52.2%) |
| Voice Capabilities Questionnaire (VCQ) | Buckley, O'Halloran (38) | Fair (40.0%) | NR | NR | NR | NR | NR |
| Voice Disability Coping Questionnaire (VDCQ) | Epstein, Hirani (39) | Good (56.0%) | NR | NR | Fair (40%) | Fair (38.9%) | *Convergent (VDQ)*  Fair (30.4%)  *Convergent (HLOC)*  Fair (30.4%)  *Convergent (BDI)*  Fair (30.4%)  *Convergent (STAI)*  Fair (30.4%)  *Convergent (RSES)*  Fair (30.4%) |
| Voice Handicap Index (VHI) | Arffa, Krishna (45) | NR | NR | Poor | NR | NR | NR |
| Awan, Roy (111) | NR | NR | NR | NR | NR | *Convergent (CAPE-V)*  Good (73.9%)  *Divergent (Gender)*  Good (64.7%) |
| Bach, Belafsky (31) | NR | NR | NR | NR | NR | *Convergent (GFI)*  Fair (30.4%) |
| Elam, Ishman (112) | NR | NR | NR | NR | NR | *Convergent (Depression)*  Good (52.2%)  *Divergent (Reflux)*  Good (52.9%) |
| Ford Baldner, Doll (53) | NR | NR | NR | NR | NR | *Convergent (Borg)*  Good (56.5%)  *Convergent (CAPE)*  Good (60.9%)  *Divergent (Voice disorder)*  Fair (47.1%) |
| Fulljames and Harris (113) | NR | NR | NR | NR | NR | *Divergent (baseline GRBAS)*  Good (70.6%)  *Divergent (baseline SRS)*  Good (70.6%)  *Divergent (baseline Acoustics)*  Good (70.6%)  *Divergent (delta change GRBAS)*  Good (70.6%)  *Divergent (delta change SRS)*  Good (70.6%)  *Divergent (delta change Acoustics)*  Good (70.6%) |
| Jacobson, Johnson (40) | Fair (44.0%) | *Intra-rater*  Fair (44.8%) | NR | Fair (40.0%) | NR | *Convergent (Voice Disorder Severity)*  Good (34.8%) |
| Kazi, De Cordova (114) | NR | NR | NR | NR | NR | *Convergent (V-RQOL)*  Good (70.0%) |
| Portone, Hapner (115) | NR | NR | NR | NR | NR | *Convergent (V-RQOL)*  Good (56.5%)  Convergent (VR-QOL diagnosis)  Good (52.2%) |
| Rosen, Lee (41) | NR | NR | NR | NR | NR | *Convergent (VHI-10)*  Excellent (82.5%) |
| Stomeo, Tosin (116) | NR | NR | NR | NR | NR | *Convergent (GIRBAS)*  Good (52.2%)  *Convergent (Accoustic)*  Good (52.2%)  *Convergent (Yanagihara classification)*  Good (52.2%)  *Convergent (Max Phonation Time)*  Good (52.2%)  *Convergent (Laryng Videostroboscopy)*  Good (52.2%) |
| Webb, Carding (110) | Good (63.9%) | *Intra-rater*  Good (75.9%) | NR | NR | NR | *Convergent (VPQ)*  Good (52.2%)  *Convergent (VoiSS)*  Good (52.2%)  *Convergent (GRBAS)*  Good (52.2%) |
| Wheeler, Collins (117) | NR | NR | NR | NR | NR | *Convergent (Acoustic)*  Fair (43.6%) |
| Wilson, Webb (46) | Good (60.0%) | NR | NR | NR | Good (58.3%) | *Divergent*  Poor (17.6%) |
| Voice Handicap Index-10 (VHI-10) | Arffa, Krishna (45) | NR | NR | Poor | NR | NR | NR |
| Childs, Bielinski (118) | NR | NR | NR | NR | NR | *Convergent*  Good (73.9%)  *Divergent (Gender)*  Good (58.8%)  *Divergent (Diagnosis)*  Good (58.8%)  *Divergent (Smoking*)  Good (70.59%)  *Divergent (Psychiatric)*  Good (70.59%) |
| Cohen, Statham (33) | NR | NR | NR | NR | NR | Convergent (SVHI-10)  Fair (34.8%) |
| Davis, Sandage (119) | NR | NR | NR | NR | NR | *Convergent (PPE)*  Good (52.2%)  *Divergent (Athlete)*  Good (52.9%)  *Divergent (Use of voice)*  Good 58.8%) |
| Deary, Webb (109) | Fair (48.0%) | NR | NR | NR | Fair (44.4%) | *Convergent (VPQ)*  Fair (43.5%) |
| Eadie, Lamvik (120) | NR | NR | NR | NR | NR | Good (69.6%) |
| Gillespie, Gooding (121) | NR | NR | NR | NR | NR | *Divergent (baseline Cape-V)*  Excellent (88.2%)  *Divergent (baseline Acoustic)*  Excellent (88.2%)  *Divergent (baseline Aerodynamic)*  Excellent (88.2%)  *Divergent (delta change Cape-V)*  Excellent (88.2%)  *Divergent (delta change Acoustic)*  Excellent (88.2%)  *Divergent (delta change Aerodynamic)*  Excellent (88.2%) |
| Hu, Hillel (122) | NR | NR | NR | NR | NR | *Convergent (CAPE-V)*  Good (65.2%)  *Convergent (HADS Anxiety*)  Good (65.2%)  *Convergent (HADS Depression)*  Good (65.2%)  *Divergent (Gender)*  Good (52.9%)  *Divergent (Age)*  Good (52.9%)  *Divergent (Time of diagnosis)*  Good (58.8%) |
| Kupfer, Cadalli Tatar (123) | NR | NR | NR | NR | NR | *Convergent (Derkay total sample)*  Fair (47.8%)  *Convergent (Excluding juvenile)*  Fair (47.8%)  *Convergent (Low prior surgery)*  Fair (43.5%)  *Convergent (High prior surgery)*  Fair (47.83%) |
| Nichols, Bock (124) | NR | NR | NR | NR | NR | *Convergent (VES13)*  Good (60.9%)  *Divergent (Frailty)*  Good (58.8%)  *Divergent (Nursing home)*  Good (58.8%) |
| Romak, Orbelo (125) | NR | NR | NR | NR | NR | *Convergent (V-RQOL)*  Good (68.8%) |
| Rosen, Lee (41) | NR | NR | NR | Excellent (85.7%) | NR | *Convergent (VHI)*  Excellent (82.5%) |
| Stachler, Schultz (126) | NR | NR | NR | NR | NR | *Convergent (PROMIS)*  Good (52.2%) |
| Willis, Michael (127) | NR | NR | NR | NR | NR | *Divergent (CF diagnosis)*  Fair (41.2%) |
| Voice Rating Scale (VRS) | Jones, Carding (82) | NR | NR | NR | NR | NR | *Convergent (VoiSS)*  Fair (47.8%) |
| Wingate, Brown (42) | NR | *Intra-rater*  Fair (31.0%)  *Inter-rater*  Fair (41.4%) | NR | NR | NR | *Convergent (VHI)*  Good (52.2%) |
| Voice-Related Quality of Life (V-RQOL) | Bornbaum, Day (128) | NR | NR | NR | NR | Good (55.6%) | NR |
| Buckmire, Bryson (105) | NR | NR | NR | NR | NR | *Convergent (GFI)*  Fair (39.1%) |
| Hogikyan and Sethuraman (43) | Fair (32.0%) | *Intra-rater*  Fair (44.8%) | NR | NR | NR | *Convergent (SF-36)*  Fair (26.10%)  *Divergent (self-reported voice problems*)  Good (52.9) |
| Karnell, Melton (64) | NR | NR | NR | NR | NR | *Convergent (IPVI)*  Good (56.5%)  *Convergent (GRBAS)*  Good (56.5%)  *Convergent (CAPE-V)*  Good (56.5%) |
| Kazi, De Cordova (114) | NR | NR | NR | NR | NR | *Convergent (VHI)*  Good (70.0%) |
| Kupfer, Hogikyan (129) | NR | NR | NR | NR | NR | *Convergent (Self-rate)*  Good (52.2%)  *(Age*)*  Good (52.9%)  *(Gender*)*  Good (52.9%)  *(Employment*)*  Good (52.9%)  *[No expected direction of correlations or mean differences included in hypothesis] |
| Murry, Medrado (130) | NR | NR | NR | NR | NR | *Convergent (GRBAS Total;*  *Subgroups per gender, age, voice disorder)*  Good (65.2%)  *Divergent (GRBAS Control*)*  Good (60.9%) |
| Portone, Hapner (115) | NR | NR | NR | NR | NR | *Convergent (VHI Total)*  Good (56.5%)  *Convergent (VHI Diagnosis)*  Good (52.2%) |
|  | Romak, Orbelo (125) | NR | NR | NR | NR | NR | *Convergent (VHI-10)*  Good (68.8%) |
| Tanner, Pierce (131) | NR | NR | NR | NR | NR | *Convergent (SF-36)*  Good (56.5%)  *Convergent (SSI-Sicca symptoms)*  Good (56.5%)  *Convergent (ESSPRI-Sicca symptoms)*  Good (56.5%)  *Divergent (Self-reported Voice disorder)*  Good (58.8%) |
| Voice Symptom Scale (VoiSS) | Deary, Wilson (44) | NR | NR | NR | Excellent (90%) | NR | NR |
| Jones, Carding (82) | NR | NR | NR | NR | NR | *Convergent (GRBAS)*  Good (52.2%)  *Convergent (VRS)*  Fair (47.8%) |
| Montgomery, Hendry (132) | NR | NR | NR | NR | NR | *Convergent (HADS Anxiety)*  Good (52.2%)  *Convergent (HADS Depression)*  Good (52.2%) |
| Webb, Carding (110) | Good (63.9%) | *Intra-rater*  Excellent (75.9%) | NR | NR | NR | *Convergent (VPQ)*  Good (52.2%)  *Convergent (VHI)*  Good (52.2%)  *Convergent (GRBAS)*  Good 52.2%) |
| Wilson, Webb (46) | Good (60.0%) | NR | NR | NR | Good (58.3%) | *Divergent*  Poor (17.6%) |

*Notes*.Responsiveness and cross-cultural validity were out of the scope of this review; Criterion validity could not be assessed due to the lack of a ‘gold standard’ measure in the field of FHS and/or HR-QoL in dysphonia; The methodological quality was determined using the COSMIN rating per item (17): excellent, good, fair, and poor. The overall methodological quality per study was presented as a percentage of the ratings (26, 27): Poor = 0-25%, Fair = 25.1% -50.0%, good = 50.1%-75%, Excellent = 75.1%-100.0%; NR = Not Reported.

Supplementary Table 8. *Quality of measurement properties per study*.

| **Questionnaire**  *(alphabetical order)* | **Reference** | **Measurement property: methodological quality per study** | | | | | |
| --- | --- | --- | --- | --- | --- | --- | --- |
| **Internal Consistency** | **Reliability** | **Measurement Error** | **Content Validity** | **Structural Validity** | **Hypothesis Testing** |
| Evaluation of the Ability to Sing Easily (EASE) | Phyland, Pallant (30) | **+** | NR | NR | **?** | **+** | NR |
| Phyland, Pallant (104) | **+** | NR | NR | NR | NR | ? |
| Glottal Function Index (GFI) | Bach, Belafsky (31) | NR | ? | NR | NR | NR | + |
| Buckmire, Bryson (105) | NR | NR | NR | NR | NR | + |
| Transgender Self-Evaluation Questionnaire (TSEQ) | Hancock, Krissinger (107) | NR | NR | NR | NR | NR | ? |
| Hancock (108) | NR | NR | NR | NR | NR | + |
| Singing Voice Handicap Index (SVHI) | Castelblanco, Habib (106) | NR | NR | NR | NR | NR | ? |
| Cohen, Jacobson (32) | - | ? | NR | ? | + | + |
| Singing Voice Handicap Index-10 (SVHI-10) | Cohen, Statham (33) | + | ? | NR | - | NR | + |
| Transsexual Voice Questionnaire - Male to Female (TVQMtF) | Dacakis, Davies (35) | ? | + | NR | NR | NR | NR |
| Vocal Fatigue Index (VFI) | Nanjundeswaran, Jacobson (36) | + | ? | NR | + | - | + |
| Vocal Performance Questionnaire (VPQ) | Carding and Horsley (37)win | NR | NR | NR | NR | NR | ? |
| Deary, Webb (109) | + | NR | NR | NR | + | + |
| Webb, Carding (110) | ? | + | NR | NR | NR | ? |
| Voice Capabilities Questionnaire (VCQ) | Buckley, O'Halloran (38) | ? | NR | NR | NR | NR | NR |
| Voice Disability Coping Questionnaire (VDCQ) | Epstein, Hirani (39) | ? | NR | NR | + | + | ? |
| Voice Handicap Index (VHI) | Awan, Roy (111) | NR | NR | NR | NR | NR | ? |
| Bach, Belafsky (31) | NR | NR | NR | NR | NR | + |
| Cohen, Statham (33) | + | ? | NR | - | NR | + |
|  | Elam, Ishman (112) | NR | NR | NR | NR | NR | ? |
| Ford Baldner, Doll (53) | NR | NR | NR | NR | NR | + |
| Fulljames and Harris (113) | NR | NR | NR | NR | NR | + |
| Hancock (108) | NR | NR | NR | NR | NR | + |
| Jacobson, Johnson (40) | ? | + | NR | ? | NR | + |
| Kazi, De Cordova (114) | NR | NR | NR | NR | NR | ? |
| Portone, Hapner (115) | NR | NR | NR | NR | NR | + |
| Rosen, Lee (41) | NR | NR | NR | NR | NR | + |
| Stomeo, Tosin (116) | NR | NR | NR | NR | NR | ? |
| Webb, Carding (110) | ? | + | NR | NR | NR | ? |
| Wheeler, Collins (117) | NR | NR | NR | NR | NR | ? |
| Wilson, Webb (46) | + | NR | NR | NR | + | NE |
| Voice Handicap Index-10 (VHI-10) | Childs, Bielinski (118) | NR | NR | NR | NR | NR | ? |
| Cohen, Statham (33) | NR | NR | NR | NR | NR | + |
| Davis, Sandage (119) | NR | NR | NR | NR | NR | ? |
| Deary, Webb (109) | + | NR | NR | NR | + | + |
| Eadie, Lamvik (120) | NR | NR | NR | NR | NR | ? |
| Gillespie, Gooding (121) | NR | NR | NR | NR | NR | ? |
| Hu, Hillel (122) | NR | NR | NR | NR | NR | ? |
| Kupfer, Cadalli Tatar (123) | NR | NR | NR | NR | NR | ? |
| Nichols, Bock (124) | NR | NR | NR | NR | NR | ? |
| Romak, Orbelo (125) | NR | NR | NR | NR | NR | + |
|  | Rosen, Lee (41) | NR | NR | NR | + | NR | + |
| Stachler, Schultz (126) | NR | NR | NR | NR | NR | ? |
| Willis, Michael (127) | NR | NR | NR | NR | NR | - |
| Voice Rating Scale (VRS) | Jones, Carding (82) | NR | NR | NR | NR | NR | *?* |
| Wingate, Brown (42) | NR | ? | NR | NR | NR | ? |
| Voice-Related Quality of Life (V-RQOL) | Bornbaum, Day (128) | NR | NR | NR | NR | + | NR |
| Buckmire, Bryson (105) | NR | NR | NR | NR | NR | + |
| Hogikyan and Sethuraman (43) | ? | + | NR | NR | NR | - |
| Karnell, Melton (64) | NR | NR | NR | NR | NR | ? |
| Kazi, De Cordova (114) | NR | NR | NR | NR | NR | ? |
|  | Kupfer, Hogikyan (129) | NR | NR | NR | NR | NR | ? |
| Murry, Medrado (130) | NR | NR | NR | NR | NR | ? |
| Portone, Hapner (115) | NR | NR | NR | NR | NR | + |
| Romak, Orbelo (125) | NR | NR | NR | NR | NR | *+* |
| Tanner, Pierce (131) | NR | NR | NR | NR | NR | ? |
| Voice Symptom Scale (VoiSS) | Deary, Wilson (44) | NR | NR | NR | ? | NR | NR |
| Jones, Carding (82) | NR | NR | NR | NR | NR | ? |
| Montgomery, Hendry (132) | NR | NR | NR | NR | NR | ? |
| Webb, Carding (110) | ? | - | NR | NR | NR | ? |
| Wilson, Webb (46) | + | NR | NR | NR | + | NE |

*Notes.* Quality criteria (22, 23) ; + = positive rating; ? = Indeterminate rating; - = negative rating; ± = conflicting data; NR = Not reported; NE = Not evaluated; Measurement properties of criterion validity and cross-cultural validity were not within the scope of this review.
